# Supplementary material
Source: publisher site journal article supplement (https://www.spandidos-publications.com/6644/downloadSupplementary)
Supplement: Supplementary file 1 [file downloadSupplementary]

## Sheet: Sheet1
Table SI. GSE142153 clinical dataset
	title	geo_accession	status	submission_date	last_update_date	type	channel_count	source_name_ch1	organism_ch1	characteristics_ch1	characteristics_ch1.1	molecule_ch1	extract_protocol_ch1	label_ch1	label_protocol_ch1	taxid_ch1	source_name_ch2	organism_ch2	characteristics_ch2	molecule_ch2	extract_protocol_ch2	label_ch2	label_protocol_ch2	taxid_ch2	hyb_protocol	scan_protocol	description	data_processing	platform_id	contact_name	contact_email	contact_phone	contact_laboratory	contact_department	contact_institute	contact_address	contact_city	contact_state	contact_zip/postal_code	contact_country	supplementary_file	data_row_count	diagnosis:ch1	tissue:ch1	tissue:ch2
GSM4221568	N5	GSM4221568	Public on Dec 01 2020	Dec 16 2019	Dec 02 2020	RNA	2	blood	Homo sapiens	tissue: peripheral blood	diagnosis: healthy control	total RNA	The blood was drawn in the presence of sodium heparin. Total RNA was extracted using the RNeasy Mini Kit (Qiagen, Valencia, CA).	Cy5	Cy5-CTP (exposed samples) and Cy3-CTP (negative control samples) were fluorescently labeled during the step of cDNA was transcribed into complimentary RNA (cRNA). We used Agilent LIRAK PLUS, two color Low Input RNA Linear Amplification Kit method according manufacturer’s instructions	9606	human reference total RNA pool	Homo sapiens	tissue: 10 human cell lines	total RNA	The blood was drawn in the presence of sodium heparin. Total RNA was extracted using the RNeasy Mini Kit (Qiagen, Valencia, CA).	Cy3	Cy5-CTP (exposed samples) and Cy3-CTP (negative control samples) were fluorescently labeled during the step of cDNA was transcribed into complimentary RNA (cRNA). We used Agilent LIRAK PLUS, two color Low Input RNA Linear Amplification Kit method according manufacturer’s instructions	9606	We followed Agilent’s hybridization protocol. Equal amounts of the exposed and negative control sample (825 ng) were competitively hybridized onto Agilent Whole 4×44K Human oligonucleotide arrays in a hybridization oven at 65°C for 17 hours. Slides were washed according to the manufacturer’s instructions with washing buffers and finally dipped in Stabilization and Drying Solution (Agilent Technol…	We followed Agilent’s scan protocol. The arrays were scanned on an Agilent scanner (G2565BA, Agilent Technologies, Palo Alto, CA), and further processed using Agilent Feature Extraction Software	HC1	Agilent Feature Extraction Software was used for background subtraction GeneSpring was used for normalization	GPL6480	Swastika,,Sur	swastika.sur@gmail.com	4027091326	Sarwal Lab	Surgery	UCSF	513 Parnassus Ave	San Francisco	CA	94143	USA	ftp://ftp.ncbi.nlm.nih.gov/geo/samples/GSM4221nnn/GSM4221568/suppl/GSM4221568_251485074261_201209201033_S01_GE2_107_Sep09_1_3_Briggs__N5_.txt.gz	30811	healthy control	peripheral blood	10 human cell lines
GSM4221569	N7	GSM4221569	Public on Dec 01 2020	Dec 16 2019	Dec 02 2020	RNA	2	blood	Homo sapiens	tissue: peripheral blood	diagnosis: healthy control	total RNA	The blood was drawn in the presence of sodium heparin. Total RNA was extracted using the RNeasy Mini Kit (Qiagen, Valencia, CA).	Cy5	Cy5-CTP (exposed samples) and Cy3-CTP (negative control samples) were fluorescently labeled during the step of cDNA was transcribed into complimentary RNA (cRNA). We used Agilent LIRAK PLUS, two color Low Input RNA Linear Amplification Kit method according manufacturer’s instructions	9606	human reference total RNA pool	Homo sapiens	tissue: 10 human cell lines	total RNA	The blood was drawn in the presence of sodium heparin. Total RNA was extracted using the RNeasy Mini Kit (Qiagen, Valencia, CA).	Cy3	Cy5-CTP (exposed samples) and Cy3-CTP (negative control samples) were fluorescently labeled during the step of cDNA was transcribed into complimentary RNA (cRNA). We used Agilent LIRAK PLUS, two color Low Input RNA Linear Amplification Kit method according manufacturer’s instructions	9606	We followed Agilent’s hybridization protocol. Equal amounts of the exposed and negative control sample (825 ng) were competitively hybridized onto Agilent Whole 4×44K Human oligonucleotide arrays in a hybridization oven at 65°C for 17 hours. Slides were washed according to the manufacturer’s instructions with washing buffers and finally dipped in Stabilization and Drying Solution (Agilent Technol…	We followed Agilent’s scan protocol. The arrays were scanned on an Agilent scanner (G2565BA, Agilent Technologies, Palo Alto, CA), and further processed using Agilent Feature Extraction Software	HC2	Agilent Feature Extraction Software was used for background subtraction GeneSpring was used for normalization	GPL6480	Swastika,,Sur	swastika.sur@gmail.com	4027091326	Sarwal Lab	Surgery	UCSF	513 Parnassus Ave	San Francisco	CA	94143	USA	ftp://ftp.ncbi.nlm.nih.gov/geo/samples/GSM4221nnn/GSM4221569/suppl/GSM4221569_251485074258_201209200946_S01_GE2_107_Sep09_1_3_Michalski__N7_.txt.gz	30811	healthy control	peripheral blood	10 human cell lines
GSM4221570	DNG1-1	GSM4221570	Public on Dec 01 2020	Dec 16 2019	Dec 02 2020	RNA	2	blood	Homo sapiens	tissue: peripheral blood	diagnosis: healthy control	total RNA	The blood was drawn in the presence of sodium heparin. Total RNA was extracted using the RNeasy Mini Kit (Qiagen, Valencia, CA).	Cy5	Cy5-CTP (exposed samples) and Cy3-CTP (negative control samples) were fluorescently labeled during the step of cDNA was transcribed into complimentary RNA (cRNA). We used Agilent LIRAK PLUS, two color Low Input RNA Linear Amplification Kit method according manufacturer’s instructions	9606	human reference total RNA pool	Homo sapiens	tissue: 10 human cell lines	total RNA	The blood was drawn in the presence of sodium heparin. Total RNA was extracted using the RNeasy Mini Kit (Qiagen, Valencia, CA).	Cy3	Cy5-CTP (exposed samples) and Cy3-CTP (negative control samples) were fluorescently labeled during the step of cDNA was transcribed into complimentary RNA (cRNA). We used Agilent LIRAK PLUS, two color Low Input RNA Linear Amplification Kit method according manufacturer’s instructions	9606	We followed Agilent’s hybridization protocol. Equal amounts of the exposed and negative control sample (825 ng) were competitively hybridized onto Agilent Whole 4×44K Human oligonucleotide arrays in a hybridization oven at 65°C for 17 hours. Slides were washed according to the manufacturer’s instructions with washing buffers and finally dipped in Stabilization and Drying Solution (Agilent Technol…	We followed Agilent’s scan protocol. The arrays were scanned on an Agilent scanner (G2565BA, Agilent Technologies, Palo Alto, CA), and further processed using Agilent Feature Extraction Software	HC3	Agilent Feature Extraction Software was used for background subtraction GeneSpring was used for normalization	GPL6480	Swastika,,Sur	swastika.sur@gmail.com	4027091326	Sarwal Lab	Surgery	UCSF	513 Parnassus Ave	San Francisco	CA	94143	USA	ftp://ftp.ncbi.nlm.nih.gov/geo/samples/GSM4221nnn/GSM4221570/suppl/GSM4221570_251485073849_201209181002_S01_GE2_107_Sep09_1_3_DNG1-1_.txt.gz	30811	healthy control	peripheral blood	10 human cell lines
GSM4221571	DNG1-2	GSM4221571	Public on Dec 01 2020	Dec 16 2019	Dec 02 2020	RNA	2	blood	Homo sapiens	tissue: peripheral blood	diagnosis: healthy control	total RNA	The blood was drawn in the presence of sodium heparin. Total RNA was extracted using the RNeasy Mini Kit (Qiagen, Valencia, CA).	Cy5	Cy5-CTP (exposed samples) and Cy3-CTP (negative control samples) were fluorescently labeled during the step of cDNA was transcribed into complimentary RNA (cRNA). We used Agilent LIRAK PLUS, two color Low Input RNA Linear Amplification Kit method according manufacturer’s instructions	9606	human reference total RNA pool	Homo sapiens	tissue: 10 human cell lines	total RNA	The blood was drawn in the presence of sodium heparin. Total RNA was extracted using the RNeasy Mini Kit (Qiagen, Valencia, CA).	Cy3	Cy5-CTP (exposed samples) and Cy3-CTP (negative control samples) were fluorescently labeled during the step of cDNA was transcribed into complimentary RNA (cRNA). We used Agilent LIRAK PLUS, two color Low Input RNA Linear Amplification Kit method according manufacturer’s instructions	9606	We followed Agilent’s hybridization protocol. Equal amounts of the exposed and negative control sample (825 ng) were competitively hybridized onto Agilent Whole 4×44K Human oligonucleotide arrays in a hybridization oven at 65°C for 17 hours. Slides were washed according to the manufacturer’s instructions with washing buffers and finally dipped in Stabilization and Drying Solution (Agilent Technol…	We followed Agilent’s scan protocol. The arrays were scanned on an Agilent scanner (G2565BA, Agilent Technologies, Palo Alto, CA), and further processed using Agilent Feature Extraction Software	HC4	Agilent Feature Extraction Software was used for background subtraction GeneSpring was used for normalization	GPL6480	Swastika,,Sur	swastika.sur@gmail.com	4027091326	Sarwal Lab	Surgery	UCSF	513 Parnassus Ave	San Francisco	CA	94143	USA	ftp://ftp.ncbi.nlm.nih.gov/geo/samples/GSM4221nnn/GSM4221571/suppl/GSM4221571_251485073846_201209181018_S01_GE2_107_Sep09_1_4_DNG1-2_.txt.gz	30811	healthy control	peripheral blood	10 human cell lines
GSM4221572	DNG1-3	GSM4221572	Public on Dec 01 2020	Dec 16 2019	Dec 02 2020	RNA	2	blood	Homo sapiens	tissue: peripheral blood	diagnosis: healthy control	total RNA	The blood was drawn in the presence of sodium heparin. Total RNA was extracted using the RNeasy Mini Kit (Qiagen, Valencia, CA).	Cy5	Cy5-CTP (exposed samples) and Cy3-CTP (negative control samples) were fluorescently labeled during the step of cDNA was transcribed into complimentary RNA (cRNA). We used Agilent LIRAK PLUS, two color Low Input RNA Linear Amplification Kit method according manufacturer’s instructions	9606	human reference total RNA pool	Homo sapiens	tissue: 10 human cell lines	total RNA	The blood was drawn in the presence of sodium heparin. Total RNA was extracted using the RNeasy Mini Kit (Qiagen, Valencia, CA).	Cy3	Cy5-CTP (exposed samples) and Cy3-CTP (negative control samples) were fluorescently labeled during the step of cDNA was transcribed into complimentary RNA (cRNA). We used Agilent LIRAK PLUS, two color Low Input RNA Linear Amplification Kit method according manufacturer’s instructions	9606	We followed Agilent’s hybridization protocol. Equal amounts of the exposed and negative control sample (825 ng) were competitively hybridized onto Agilent Whole 4×44K Human oligonucleotide arrays in a hybridization oven at 65°C for 17 hours. Slides were washed according to the manufacturer’s instructions with washing buffers and finally dipped in Stabilization and Drying Solution (Agilent Technol…	We followed Agilent’s scan protocol. The arrays were scanned on an Agilent scanner (G2565BA, Agilent Technologies, Palo Alto, CA), and further processed using Agilent Feature Extraction Software	HC5	Agilent Feature Extraction Software was used for background subtraction GeneSpring was used for normalization	GPL6480	Swastika,,Sur	swastika.sur@gmail.com	4027091326	Sarwal Lab	Surgery	UCSF	513 Parnassus Ave	San Francisco	CA	94143	USA	ftp://ftp.ncbi.nlm.nih.gov/geo/samples/GSM4221nnn/GSM4221572/suppl/GSM4221572_251485073874_201209201049_S01_GE2_107_Sep09_1_1_DNG1-3_.txt.gz	30811	healthy control	peripheral blood	10 human cell lines
GSM4221573	DNG1-4	GSM4221573	Public on Dec 01 2020	Dec 16 2019	Dec 02 2020	RNA	2	blood	Homo sapiens	tissue: peripheral blood	diagnosis: healthy control	total RNA	The blood was drawn in the presence of sodium heparin. Total RNA was extracted using the RNeasy Mini Kit (Qiagen, Valencia, CA).	Cy5	Cy5-CTP (exposed samples) and Cy3-CTP (negative control samples) were fluorescently labeled during the step of cDNA was transcribed into complimentary RNA (cRNA). We used Agilent LIRAK PLUS, two color Low Input RNA Linear Amplification Kit method according manufacturer’s instructions	9606	human reference total RNA pool	Homo sapiens	tissue: 10 human cell lines	total RNA	The blood was drawn in the presence of sodium heparin. Total RNA was extracted using the RNeasy Mini Kit (Qiagen, Valencia, CA).	Cy3	Cy5-CTP (exposed samples) and Cy3-CTP (negative control samples) were fluorescently labeled during the step of cDNA was transcribed into complimentary RNA (cRNA). We used Agilent LIRAK PLUS, two color Low Input RNA Linear Amplification Kit method according manufacturer’s instructions	9606	We followed Agilent’s hybridization protocol. Equal amounts of the exposed and negative control sample (825 ng) were competitively hybridized onto Agilent Whole 4×44K Human oligonucleotide arrays in a hybridization oven at 65°C for 17 hours. Slides were washed according to the manufacturer’s instructions with washing buffers and finally dipped in Stabilization and Drying Solution (Agilent Technol…	We followed Agilent’s scan protocol. The arrays were scanned on an Agilent scanner (G2565BA, Agilent Technologies, Palo Alto, CA), and further processed using Agilent Feature Extraction Software	HC6	Agilent Feature Extraction Software was used for background subtraction GeneSpring was used for normalization	GPL6480	Swastika,,Sur	swastika.sur@gmail.com	4027091326	Sarwal Lab	Surgery	UCSF	513 Parnassus Ave	San Francisco	CA	94143	USA	ftp://ftp.ncbi.nlm.nih.gov/geo/samples/GSM4221nnn/GSM4221573/suppl/GSM4221573_251485073849_201209181002_S01_GE2_107_Sep09_1_2_DNG1-4_.txt.gz	30811	healthy control	peripheral blood	10 human cell lines
GSM4221574	DNG1-5	GSM4221574	Public on Dec 01 2020	Dec 16 2019	Dec 02 2020	RNA	2	blood	Homo sapiens	tissue: peripheral blood	diagnosis: healthy control	total RNA	The blood was drawn in the presence of sodium heparin. Total RNA was extracted using the RNeasy Mini Kit (Qiagen, Valencia, CA).	Cy5	Cy5-CTP (exposed samples) and Cy3-CTP (negative control samples) were fluorescently labeled during the step of cDNA was transcribed into complimentary RNA (cRNA). We used Agilent LIRAK PLUS, two color Low Input RNA Linear Amplification Kit method according manufacturer’s instructions	9606	human reference total RNA pool	Homo sapiens	tissue: 10 human cell lines	total RNA	The blood was drawn in the presence of sodium heparin. Total RNA was extracted using the RNeasy Mini Kit (Qiagen, Valencia, CA).	Cy3	Cy5-CTP (exposed samples) and Cy3-CTP (negative control samples) were fluorescently labeled during the step of cDNA was transcribed into complimentary RNA (cRNA). We used Agilent LIRAK PLUS, two color Low Input RNA Linear Amplification Kit method according manufacturer’s instructions	9606	We followed Agilent’s hybridization protocol. Equal amounts of the exposed and negative control sample (825 ng) were competitively hybridized onto Agilent Whole 4×44K Human oligonucleotide arrays in a hybridization oven at 65°C for 17 hours. Slides were washed according to the manufacturer’s instructions with washing buffers and finally dipped in Stabilization and Drying Solution (Agilent Technol…	We followed Agilent’s scan protocol. The arrays were scanned on an Agilent scanner (G2565BA, Agilent Technologies, Palo Alto, CA), and further processed using Agilent Feature Extraction Software	HC7	Agilent Feature Extraction Software was used for background subtraction GeneSpring was used for normalization	GPL6480	Swastika,,Sur	swastika.sur@gmail.com	4027091326	Sarwal Lab	Surgery	UCSF	513 Parnassus Ave	San Francisco	CA	94143	USA	ftp://ftp.ncbi.nlm.nih.gov/geo/samples/GSM4221nnn/GSM4221574/suppl/GSM4221574_251485073874_201209201049_S01_GE2_107_Sep09_1_3_DNG1-5_.txt.gz	30811	healthy control	peripheral blood	10 human cell lines
GSM4221575	DNG1-6	GSM4221575	Public on Dec 01 2020	Dec 16 2019	Dec 02 2020	RNA	2	blood	Homo sapiens	tissue: peripheral blood	diagnosis: healthy control	total RNA	The blood was drawn in the presence of sodium heparin. Total RNA was extracted using the RNeasy Mini Kit (Qiagen, Valencia, CA).	Cy5	Cy5-CTP (exposed samples) and Cy3-CTP (negative control samples) were fluorescently labeled during the step of cDNA was transcribed into complimentary RNA (cRNA). We used Agilent LIRAK PLUS, two color Low Input RNA Linear Amplification Kit method according manufacturer’s instructions	9606	human reference total RNA pool	Homo sapiens	tissue: 10 human cell lines	total RNA	The blood was drawn in the presence of sodium heparin. Total RNA was extracted using the RNeasy Mini Kit (Qiagen, Valencia, CA).	Cy3	Cy5-CTP (exposed samples) and Cy3-CTP (negative control samples) were fluorescently labeled during the step of cDNA was transcribed into complimentary RNA (cRNA). We used Agilent LIRAK PLUS, two color Low Input RNA Linear Amplification Kit method according manufacturer’s instructions	9606	We followed Agilent’s hybridization protocol. Equal amounts of the exposed and negative control sample (825 ng) were competitively hybridized onto Agilent Whole 4×44K Human oligonucleotide arrays in a hybridization oven at 65°C for 17 hours. Slides were washed according to the manufacturer’s instructions with washing buffers and finally dipped in Stabilization and Drying Solution (Agilent Technol…	We followed Agilent’s scan protocol. The arrays were scanned on an Agilent scanner (G2565BA, Agilent Technologies, Palo Alto, CA), and further processed using Agilent Feature Extraction Software	HC8	Agilent Feature Extraction Software was used for background subtraction GeneSpring was used for normalization	GPL6480	Swastika,,Sur	swastika.sur@gmail.com	4027091326	Sarwal Lab	Surgery	UCSF	513 Parnassus Ave	San Francisco	CA	94143	USA	ftp://ftp.ncbi.nlm.nih.gov/geo/samples/GSM4221nnn/GSM4221575/suppl/GSM4221575_251485073874_201209201049_S01_GE2_107_Sep09_1_2_DNG1-6_.txt.gz	30811	healthy control	peripheral blood	10 human cell lines
GSM4221576	DNG1-8	GSM4221576	Public on Dec 01 2020	Dec 16 2019	Dec 02 2020	RNA	2	blood	Homo sapiens	tissue: peripheral blood	diagnosis: healthy control	total RNA	The blood was drawn in the presence of sodium heparin. Total RNA was extracted using the RNeasy Mini Kit (Qiagen, Valencia, CA).	Cy5	Cy5-CTP (exposed samples) and Cy3-CTP (negative control samples) were fluorescently labeled during the step of cDNA was transcribed into complimentary RNA (cRNA). We used Agilent LIRAK PLUS, two color Low Input RNA Linear Amplification Kit method according manufacturer’s instructions	9606	human reference total RNA pool	Homo sapiens	tissue: 10 human cell lines	total RNA	The blood was drawn in the presence of sodium heparin. Total RNA was extracted using the RNeasy Mini Kit (Qiagen, Valencia, CA).	Cy3	Cy5-CTP (exposed samples) and Cy3-CTP (negative control samples) were fluorescently labeled during the step of cDNA was transcribed into complimentary RNA (cRNA). We used Agilent LIRAK PLUS, two color Low Input RNA Linear Amplification Kit method according manufacturer’s instructions	9606	We followed Agilent’s hybridization protocol. Equal amounts of the exposed and negative control sample (825 ng) were competitively hybridized onto Agilent Whole 4×44K Human oligonucleotide arrays in a hybridization oven at 65°C for 17 hours. Slides were washed according to the manufacturer’s instructions with washing buffers and finally dipped in Stabilization and Drying Solution (Agilent Technol…	We followed Agilent’s scan protocol. The arrays were scanned on an Agilent scanner (G2565BA, Agilent Technologies, Palo Alto, CA), and further processed using Agilent Feature Extraction Software	HC9	Agilent Feature Extraction Software was used for background subtraction GeneSpring was used for normalization	GPL6480	Swastika,,Sur	swastika.sur@gmail.com	4027091326	Sarwal Lab	Surgery	UCSF	513 Parnassus Ave	San Francisco	CA	94143	USA	ftp://ftp.ncbi.nlm.nih.gov/geo/samples/GSM4221nnn/GSM4221576/suppl/GSM4221576_251485073874_201209201049_S01_GE2_107_Sep09_1_4_DNG1-8_.txt.gz	30811	healthy control	peripheral blood	10 human cell lines
GSM4221577	DNG1-9	GSM4221577	Public on Dec 01 2020	Dec 16 2019	Dec 02 2020	RNA	2	blood	Homo sapiens	tissue: peripheral blood	diagnosis: healthy control	total RNA	The blood was drawn in the presence of sodium heparin. Total RNA was extracted using the RNeasy Mini Kit (Qiagen, Valencia, CA).	Cy5	Cy5-CTP (exposed samples) and Cy3-CTP (negative control samples) were fluorescently labeled during the step of cDNA was transcribed into complimentary RNA (cRNA). We used Agilent LIRAK PLUS, two color Low Input RNA Linear Amplification Kit method according manufacturer’s instructions	9606	human reference total RNA pool	Homo sapiens	tissue: 10 human cell lines	total RNA	The blood was drawn in the presence of sodium heparin. Total RNA was extracted using the RNeasy Mini Kit (Qiagen, Valencia, CA).	Cy3	Cy5-CTP (exposed samples) and Cy3-CTP (negative control samples) were fluorescently labeled during the step of cDNA was transcribed into complimentary RNA (cRNA). We used Agilent LIRAK PLUS, two color Low Input RNA Linear Amplification Kit method according manufacturer’s instructions	9606	We followed Agilent’s hybridization protocol. Equal amounts of the exposed and negative control sample (825 ng) were competitively hybridized onto Agilent Whole 4×44K Human oligonucleotide arrays in a hybridization oven at 65°C for 17 hours. Slides were washed according to the manufacturer’s instructions with washing buffers and finally dipped in Stabilization and Drying Solution (Agilent Technol…	We followed Agilent’s scan protocol. The arrays were scanned on an Agilent scanner (G2565BA, Agilent Technologies, Palo Alto, CA), and further processed using Agilent Feature Extraction Software	HC10	Agilent Feature Extraction Software was used for background subtraction GeneSpring was used for normalization	GPL6480	Swastika,,Sur	swastika.sur@gmail.com	4027091326	Sarwal Lab	Surgery	UCSF	513 Parnassus Ave	San Francisco	CA	94143	USA	ftp://ftp.ncbi.nlm.nih.gov/geo/samples/GSM4221nnn/GSM4221577/suppl/GSM4221577_251485073846_201209181018_S01_GE2_107_Sep09_1_3_DNG1-9_.txt.gz	30811	healthy control	peripheral blood	10 human cell lines
GSM4221578	DNG2-2	GSM4221578	Public on Dec 01 2020	Dec 16 2019	Dec 02 2020	RNA	2	blood	Homo sapiens	tissue: peripheral blood	diagnosis: diabetic nephropathy	total RNA	The blood was drawn in the presence of sodium heparin. Total RNA was extracted using the RNeasy Mini Kit (Qiagen, Valencia, CA).	Cy5	Cy5-CTP (exposed samples) and Cy3-CTP (negative control samples) were fluorescently labeled during the step of cDNA was transcribed into complimentary RNA (cRNA). We used Agilent LIRAK PLUS, two color Low Input RNA Linear Amplification Kit method according manufacturer’s instructions	9606	human reference total RNA pool	Homo sapiens	tissue: 10 human cell lines	total RNA	The blood was drawn in the presence of sodium heparin. Total RNA was extracted using the RNeasy Mini Kit (Qiagen, Valencia, CA).	Cy3	Cy5-CTP (exposed samples) and Cy3-CTP (negative control samples) were fluorescently labeled during the step of cDNA was transcribed into complimentary RNA (cRNA). We used Agilent LIRAK PLUS, two color Low Input RNA Linear Amplification Kit method according manufacturer’s instructions	9606	We followed Agilent’s hybridization protocol. Equal amounts of the exposed and negative control sample (825 ng) were competitively hybridized onto Agilent Whole 4×44K Human oligonucleotide arrays in a hybridization oven at 65°C for 17 hours. Slides were washed according to the manufacturer’s instructions with washing buffers and finally dipped in Stabilization and Drying Solution (Agilent Technol…	We followed Agilent’s scan protocol. The arrays were scanned on an Agilent scanner (G2565BA, Agilent Technologies, Palo Alto, CA), and further processed using Agilent Feature Extraction Software	DM_No1	Agilent Feature Extraction Software was used for background subtraction GeneSpring was used for normalization	GPL6480	Swastika,,Sur	swastika.sur@gmail.com	4027091326	Sarwal Lab	Surgery	UCSF	513 Parnassus Ave	San Francisco	CA	94143	USA	ftp://ftp.ncbi.nlm.nih.gov/geo/samples/GSM4221nnn/GSM4221578/suppl/GSM4221578_251485074257_201209200930_S01_GE2_107_Sep09_1_3_DNG2-2_.txt.gz	30811	diabetic nephropathy	peripheral blood	10 human cell lines
GSM4221579	DNG2-8	GSM4221579	Public on Dec 01 2020	Dec 16 2019	Dec 02 2020	RNA	2	blood	Homo sapiens	tissue: peripheral blood	diagnosis: diabetic nephropathy	total RNA	The blood was drawn in the presence of sodium heparin. Total RNA was extracted using the RNeasy Mini Kit (Qiagen, Valencia, CA).	Cy5	Cy5-CTP (exposed samples) and Cy3-CTP (negative control samples) were fluorescently labeled during the step of cDNA was transcribed into complimentary RNA (cRNA). We used Agilent LIRAK PLUS, two color Low Input RNA Linear Amplification Kit method according manufacturer’s instructions	9606	human reference total RNA pool	Homo sapiens	tissue: 10 human cell lines	total RNA	The blood was drawn in the presence of sodium heparin. Total RNA was extracted using the RNeasy Mini Kit (Qiagen, Valencia, CA).	Cy3	Cy5-CTP (exposed samples) and Cy3-CTP (negative control samples) were fluorescently labeled during the step of cDNA was transcribed into complimentary RNA (cRNA). We used Agilent LIRAK PLUS, two color Low Input RNA Linear Amplification Kit method according manufacturer’s instructions	9606	We followed Agilent’s hybridization protocol. Equal amounts of the exposed and negative control sample (825 ng) were competitively hybridized onto Agilent Whole 4×44K Human oligonucleotide arrays in a hybridization oven at 65°C for 17 hours. Slides were washed according to the manufacturer’s instructions with washing buffers and finally dipped in Stabilization and Drying Solution (Agilent Technol…	We followed Agilent’s scan protocol. The arrays were scanned on an Agilent scanner (G2565BA, Agilent Technologies, Palo Alto, CA), and further processed using Agilent Feature Extraction Software	DM_No2	Agilent Feature Extraction Software was used for background subtraction GeneSpring was used for normalization	GPL6480	Swastika,,Sur	swastika.sur@gmail.com	4027091326	Sarwal Lab	Surgery	UCSF	513 Parnassus Ave	San Francisco	CA	94143	USA	ftp://ftp.ncbi.nlm.nih.gov/geo/samples/GSM4221nnn/GSM4221579/suppl/GSM4221579_251485074259_201209201002_S01_GE2_107_Sep09_1_4_DNG2-8_.txt.gz	30811	diabetic nephropathy	peripheral blood	10 human cell lines
GSM4221580	DNG2-20	GSM4221580	Public on Dec 01 2020	Dec 16 2019	Dec 02 2020	RNA	2	blood	Homo sapiens	tissue: peripheral blood	diagnosis: diabetic nephropathy	total RNA	The blood was drawn in the presence of sodium heparin. Total RNA was extracted using the RNeasy Mini Kit (Qiagen, Valencia, CA).	Cy5	Cy5-CTP (exposed samples) and Cy3-CTP (negative control samples) were fluorescently labeled during the step of cDNA was transcribed into complimentary RNA (cRNA). We used Agilent LIRAK PLUS, two color Low Input RNA Linear Amplification Kit method according manufacturer’s instructions	9606	human reference total RNA pool	Homo sapiens	tissue: 10 human cell lines	total RNA	The blood was drawn in the presence of sodium heparin. Total RNA was extracted using the RNeasy Mini Kit (Qiagen, Valencia, CA).	Cy3	Cy5-CTP (exposed samples) and Cy3-CTP (negative control samples) were fluorescently labeled during the step of cDNA was transcribed into complimentary RNA (cRNA). We used Agilent LIRAK PLUS, two color Low Input RNA Linear Amplification Kit method according manufacturer’s instructions	9606	We followed Agilent’s hybridization protocol. Equal amounts of the exposed and negative control sample (825 ng) were competitively hybridized onto Agilent Whole 4×44K Human oligonucleotide arrays in a hybridization oven at 65°C for 17 hours. Slides were washed according to the manufacturer’s instructions with washing buffers and finally dipped in Stabilization and Drying Solution (Agilent Technol…	We followed Agilent’s scan protocol. The arrays were scanned on an Agilent scanner (G2565BA, Agilent Technologies, Palo Alto, CA), and further processed using Agilent Feature Extraction Software	DM_No3	Agilent Feature Extraction Software was used for background subtraction GeneSpring was used for normalization	GPL6480	Swastika,,Sur	swastika.sur@gmail.com	4027091326	Sarwal Lab	Surgery	UCSF	513 Parnassus Ave	San Francisco	CA	94143	USA	ftp://ftp.ncbi.nlm.nih.gov/geo/samples/GSM4221nnn/GSM4221580/suppl/GSM4221580_251485074261_201209201033_S01_GE2_Sep09_1_1_DNG2-20_.txt.gz	30811	diabetic nephropathy	peripheral blood	10 human cell lines
GSM4221581	DNG2-21	GSM4221581	Public on Dec 01 2020	Dec 16 2019	Dec 02 2020	RNA	2	blood	Homo sapiens	tissue: peripheral blood	diagnosis: diabetic nephropathy	total RNA	The blood was drawn in the presence of sodium heparin. Total RNA was extracted using the RNeasy Mini Kit (Qiagen, Valencia, CA).	Cy5	Cy5-CTP (exposed samples) and Cy3-CTP (negative control samples) were fluorescently labeled during the step of cDNA was transcribed into complimentary RNA (cRNA). We used Agilent LIRAK PLUS, two color Low Input RNA Linear Amplification Kit method according manufacturer’s instructions	9606	human reference total RNA pool	Homo sapiens	tissue: 10 human cell lines	total RNA	The blood was drawn in the presence of sodium heparin. Total RNA was extracted using the RNeasy Mini Kit (Qiagen, Valencia, CA).	Cy3	Cy5-CTP (exposed samples) and Cy3-CTP (negative control samples) were fluorescently labeled during the step of cDNA was transcribed into complimentary RNA (cRNA). We used Agilent LIRAK PLUS, two color Low Input RNA Linear Amplification Kit method according manufacturer’s instructions	9606	We followed Agilent’s hybridization protocol. Equal amounts of the exposed and negative control sample (825 ng) were competitively hybridized onto Agilent Whole 4×44K Human oligonucleotide arrays in a hybridization oven at 65°C for 17 hours. Slides were washed according to the manufacturer’s instructions with washing buffers and finally dipped in Stabilization and Drying Solution (Agilent Technol…	We followed Agilent’s scan protocol. The arrays were scanned on an Agilent scanner (G2565BA, Agilent Technologies, Palo Alto, CA), and further processed using Agilent Feature Extraction Software	DM_No4	Agilent Feature Extraction Software was used for background subtraction GeneSpring was used for normalization	GPL6480	Swastika,,Sur	swastika.sur@gmail.com	4027091326	Sarwal Lab	Surgery	UCSF	513 Parnassus Ave	San Francisco	CA	94143	USA	ftp://ftp.ncbi.nlm.nih.gov/geo/samples/GSM4221nnn/GSM4221581/suppl/GSM4221581_251485074260_201209201017_S01_GE2_107_Sep09_1_3_DNG2-21_.txt.gz	30811	diabetic nephropathy	peripheral blood	10 human cell lines
GSM4221582	DNG2-23	GSM4221582	Public on Dec 01 2020	Dec 16 2019	Dec 02 2020	RNA	2	blood	Homo sapiens	tissue: peripheral blood	diagnosis: diabetic nephropathy	total RNA	The blood was drawn in the presence of sodium heparin. Total RNA was extracted using the RNeasy Mini Kit (Qiagen, Valencia, CA).	Cy5	Cy5-CTP (exposed samples) and Cy3-CTP (negative control samples) were fluorescently labeled during the step of cDNA was transcribed into complimentary RNA (cRNA). We used Agilent LIRAK PLUS, two color Low Input RNA Linear Amplification Kit method according manufacturer’s instructions	9606	human reference total RNA pool	Homo sapiens	tissue: 10 human cell lines	total RNA	The blood was drawn in the presence of sodium heparin. Total RNA was extracted using the RNeasy Mini Kit (Qiagen, Valencia, CA).	Cy3	Cy5-CTP (exposed samples) and Cy3-CTP (negative control samples) were fluorescently labeled during the step of cDNA was transcribed into complimentary RNA (cRNA). We used Agilent LIRAK PLUS, two color Low Input RNA Linear Amplification Kit method according manufacturer’s instructions	9606	We followed Agilent’s hybridization protocol. Equal amounts of the exposed and negative control sample (825 ng) were competitively hybridized onto Agilent Whole 4×44K Human oligonucleotide arrays in a hybridization oven at 65°C for 17 hours. Slides were washed according to the manufacturer’s instructions with washing buffers and finally dipped in Stabilization and Drying Solution (Agilent Technol…	We followed Agilent’s scan protocol. The arrays were scanned on an Agilent scanner (G2565BA, Agilent Technologies, Palo Alto, CA), and further processed using Agilent Feature Extraction Software	DM_No5	Agilent Feature Extraction Software was used for background subtraction GeneSpring was used for normalization	GPL6480	Swastika,,Sur	swastika.sur@gmail.com	4027091326	Sarwal Lab	Surgery	UCSF	513 Parnassus Ave	San Francisco	CA	94143	USA	ftp://ftp.ncbi.nlm.nih.gov/geo/samples/GSM4221nnn/GSM4221582/suppl/GSM4221582_251485073848_201209180930_S01_GE2_107_Sep09_1_2_DNG2-23_.txt.gz	30811	diabetic nephropathy	peripheral blood	10 human cell lines
GSM4221583	DNG2-24	GSM4221583	Public on Dec 01 2020	Dec 16 2019	Dec 02 2020	RNA	2	blood	Homo sapiens	tissue: peripheral blood	diagnosis: diabetic nephropathy	total RNA	The blood was drawn in the presence of sodium heparin. Total RNA was extracted using the RNeasy Mini Kit (Qiagen, Valencia, CA).	Cy5	Cy5-CTP (exposed samples) and Cy3-CTP (negative control samples) were fluorescently labeled during the step of cDNA was transcribed into complimentary RNA (cRNA). We used Agilent LIRAK PLUS, two color Low Input RNA Linear Amplification Kit method according manufacturer’s instructions	9606	human reference total RNA pool	Homo sapiens	tissue: 10 human cell lines	total RNA	The blood was drawn in the presence of sodium heparin. Total RNA was extracted using the RNeasy Mini Kit (Qiagen, Valencia, CA).	Cy3	Cy5-CTP (exposed samples) and Cy3-CTP (negative control samples) were fluorescently labeled during the step of cDNA was transcribed into complimentary RNA (cRNA). We used Agilent LIRAK PLUS, two color Low Input RNA Linear Amplification Kit method according manufacturer’s instructions	9606	We followed Agilent’s hybridization protocol. Equal amounts of the exposed and negative control sample (825 ng) were competitively hybridized onto Agilent Whole 4×44K Human oligonucleotide arrays in a hybridization oven at 65°C for 17 hours. Slides were washed according to the manufacturer’s instructions with washing buffers and finally dipped in Stabilization and Drying Solution (Agilent Technol…	We followed Agilent’s scan protocol. The arrays were scanned on an Agilent scanner (G2565BA, Agilent Technologies, Palo Alto, CA), and further processed using Agilent Feature Extraction Software	DM_No6	Agilent Feature Extraction Software was used for background subtraction GeneSpring was used for normalization	GPL6480	Swastika,,Sur	swastika.sur@gmail.com	4027091326	Sarwal Lab	Surgery	UCSF	513 Parnassus Ave	San Francisco	CA	94143	USA	ftp://ftp.ncbi.nlm.nih.gov/geo/samples/GSM4221nnn/GSM4221583/suppl/GSM4221583_251485073847_201209180946_S01_GE2_107_Sep09_1_3_DNG2-24_.txt.gz	30811	diabetic nephropathy	peripheral blood	10 human cell lines
GSM4221584	DNG2-26	GSM4221584	Public on Dec 01 2020	Dec 16 2019	Dec 02 2020	RNA	2	blood	Homo sapiens	tissue: peripheral blood	diagnosis: diabetic nephropathy	total RNA	The blood was drawn in the presence of sodium heparin. Total RNA was extracted using the RNeasy Mini Kit (Qiagen, Valencia, CA).	Cy5	Cy5-CTP (exposed samples) and Cy3-CTP (negative control samples) were fluorescently labeled during the step of cDNA was transcribed into complimentary RNA (cRNA). We used Agilent LIRAK PLUS, two color Low Input RNA Linear Amplification Kit method according manufacturer’s instructions	9606	human reference total RNA pool	Homo sapiens	tissue: 10 human cell lines	total RNA	The blood was drawn in the presence of sodium heparin. Total RNA was extracted using the RNeasy Mini Kit (Qiagen, Valencia, CA).	Cy3	Cy5-CTP (exposed samples) and Cy3-CTP (negative control samples) were fluorescently labeled during the step of cDNA was transcribed into complimentary RNA (cRNA). We used Agilent LIRAK PLUS, two color Low Input RNA Linear Amplification Kit method according manufacturer’s instructions	9606	We followed Agilent’s hybridization protocol. Equal amounts of the exposed and negative control sample (825 ng) were competitively hybridized onto Agilent Whole 4×44K Human oligonucleotide arrays in a hybridization oven at 65°C for 17 hours. Slides were washed according to the manufacturer’s instructions with washing buffers and finally dipped in Stabilization and Drying Solution (Agilent Technol…	We followed Agilent’s scan protocol. The arrays were scanned on an Agilent scanner (G2565BA, Agilent Technologies, Palo Alto, CA), and further processed using Agilent Feature Extraction Software	DM_No7	Agilent Feature Extraction Software was used for background subtraction GeneSpring was used for normalization	GPL6480	Swastika,,Sur	swastika.sur@gmail.com	4027091326	Sarwal Lab	Surgery	UCSF	513 Parnassus Ave	San Francisco	CA	94143	USA	ftp://ftp.ncbi.nlm.nih.gov/geo/samples/GSM4221nnn/GSM4221584/suppl/GSM4221584_251485073849_201209181002_S01_GE2_107_Sep09_1_1_DNG2-26_.txt.gz	30811	diabetic nephropathy	peripheral blood	10 human cell lines
GSM4221585	DNG2-27	GSM4221585	Public on Dec 01 2020	Dec 16 2019	Dec 02 2020	RNA	2	blood	Homo sapiens	tissue: peripheral blood	diagnosis: diabetic nephropathy	total RNA	The blood was drawn in the presence of sodium heparin. Total RNA was extracted using the RNeasy Mini Kit (Qiagen, Valencia, CA).	Cy5	Cy5-CTP (exposed samples) and Cy3-CTP (negative control samples) were fluorescently labeled during the step of cDNA was transcribed into complimentary RNA (cRNA). We used Agilent LIRAK PLUS, two color Low Input RNA Linear Amplification Kit method according manufacturer’s instructions	9606	human reference total RNA pool	Homo sapiens	tissue: 10 human cell lines	total RNA	The blood was drawn in the presence of sodium heparin. Total RNA was extracted using the RNeasy Mini Kit (Qiagen, Valencia, CA).	Cy3	Cy5-CTP (exposed samples) and Cy3-CTP (negative control samples) were fluorescently labeled during the step of cDNA was transcribed into complimentary RNA (cRNA). We used Agilent LIRAK PLUS, two color Low Input RNA Linear Amplification Kit method according manufacturer’s instructions	9606	We followed Agilent’s hybridization protocol. Equal amounts of the exposed and negative control sample (825 ng) were competitively hybridized onto Agilent Whole 4×44K Human oligonucleotide arrays in a hybridization oven at 65°C for 17 hours. Slides were washed according to the manufacturer’s instructions with washing buffers and finally dipped in Stabilization and Drying Solution (Agilent Technol…	We followed Agilent’s scan protocol. The arrays were scanned on an Agilent scanner (G2565BA, Agilent Technologies, Palo Alto, CA), and further processed using Agilent Feature Extraction Software	DM_No8	Agilent Feature Extraction Software was used for background subtraction GeneSpring was used for normalization	GPL6480	Swastika,,Sur	swastika.sur@gmail.com	4027091326	Sarwal Lab	Surgery	UCSF	513 Parnassus Ave	San Francisco	CA	94143	USA	ftp://ftp.ncbi.nlm.nih.gov/geo/samples/GSM4221nnn/GSM4221585/suppl/GSM4221585_251485074258_201209200946_S01_GE2_107_Sep09_1_4_DNG2-27_.txt.gz	30811	diabetic nephropathy	peripheral blood	10 human cell lines
GSM4221586	DNG2-30	GSM4221586	Public on Dec 01 2020	Dec 16 2019	Dec 02 2020	RNA	2	blood	Homo sapiens	tissue: peripheral blood	diagnosis: diabetic nephropathy	total RNA	The blood was drawn in the presence of sodium heparin. Total RNA was extracted using the RNeasy Mini Kit (Qiagen, Valencia, CA).	Cy5	Cy5-CTP (exposed samples) and Cy3-CTP (negative control samples) were fluorescently labeled during the step of cDNA was transcribed into complimentary RNA (cRNA). We used Agilent LIRAK PLUS, two color Low Input RNA Linear Amplification Kit method according manufacturer’s instructions	9606	human reference total RNA pool	Homo sapiens	tissue: 10 human cell lines	total RNA	The blood was drawn in the presence of sodium heparin. Total RNA was extracted using the RNeasy Mini Kit (Qiagen, Valencia, CA).	Cy3	Cy5-CTP (exposed samples) and Cy3-CTP (negative control samples) were fluorescently labeled during the step of cDNA was transcribed into complimentary RNA (cRNA). We used Agilent LIRAK PLUS, two color Low Input RNA Linear Amplification Kit method according manufacturer’s instructions	9606	We followed Agilent’s hybridization protocol. Equal amounts of the exposed and negative control sample (825 ng) were competitively hybridized onto Agilent Whole 4×44K Human oligonucleotide arrays in a hybridization oven at 65°C for 17 hours. Slides were washed according to the manufacturer’s instructions with washing buffers and finally dipped in Stabilization and Drying Solution (Agilent Technol…	We followed Agilent’s scan protocol. The arrays were scanned on an Agilent scanner (G2565BA, Agilent Technologies, Palo Alto, CA), and further processed using Agilent Feature Extraction Software	DM_No9	Agilent Feature Extraction Software was used for background subtraction GeneSpring was used for normalization	GPL6480	Swastika,,Sur	swastika.sur@gmail.com	4027091326	Sarwal Lab	Surgery	UCSF	513 Parnassus Ave	San Francisco	CA	94143	USA	ftp://ftp.ncbi.nlm.nih.gov/geo/samples/GSM4221nnn/GSM4221586/suppl/GSM4221586_251485074259_201209201002_S01_GE2_107_Sep09_1_2_DNG2-30_.txt.gz	30811	diabetic nephropathy	peripheral blood	10 human cell lines
GSM4221587	DNG3-5	GSM4221587	Public on Dec 01 2020	Dec 16 2019	Dec 02 2020	RNA	2	blood	Homo sapiens	tissue: peripheral blood	diagnosis: diabetic nephropathy	total RNA	The blood was drawn in the presence of sodium heparin. Total RNA was extracted using the RNeasy Mini Kit (Qiagen, Valencia, CA).	Cy5	Cy5-CTP (exposed samples) and Cy3-CTP (negative control samples) were fluorescently labeled during the step of cDNA was transcribed into complimentary RNA (cRNA). We used Agilent LIRAK PLUS, two color Low Input RNA Linear Amplification Kit method according manufacturer’s instructions	9606	human reference total RNA pool	Homo sapiens	tissue: 10 human cell lines	total RNA	The blood was drawn in the presence of sodium heparin. Total RNA was extracted using the RNeasy Mini Kit (Qiagen, Valencia, CA).	Cy3	Cy5-CTP (exposed samples) and Cy3-CTP (negative control samples) were fluorescently labeled during the step of cDNA was transcribed into complimentary RNA (cRNA). We used Agilent LIRAK PLUS, two color Low Input RNA Linear Amplification Kit method according manufacturer’s instructions	9606	We followed Agilent’s hybridization protocol. Equal amounts of the exposed and negative control sample (825 ng) were competitively hybridized onto Agilent Whole 4×44K Human oligonucleotide arrays in a hybridization oven at 65°C for 17 hours. Slides were washed according to the manufacturer’s instructions with washing buffers and finally dipped in Stabilization and Drying Solution (Agilent Technol…	We followed Agilent’s scan protocol. The arrays were scanned on an Agilent scanner (G2565BA, Agilent Technologies, Palo Alto, CA), and further processed using Agilent Feature Extraction Software	DM_No10	Agilent Feature Extraction Software was used for background subtraction GeneSpring was used for normalization	GPL6480	Swastika,,Sur	swastika.sur@gmail.com	4027091326	Sarwal Lab	Surgery	UCSF	513 Parnassus Ave	San Francisco	CA	94143	USA	ftp://ftp.ncbi.nlm.nih.gov/geo/samples/GSM4221nnn/GSM4221587/suppl/GSM4221587_251485074260_201209201017_S01_GE2_107_Sep09_1_4_DNG3-5_.txt.gz	30811	diabetic nephropathy	peripheral blood	10 human cell lines
GSM4221588	DNG3-7	GSM4221588	Public on Dec 01 2020	Dec 16 2019	Dec 02 2020	RNA	2	blood	Homo sapiens	tissue: peripheral blood	diagnosis: diabetic nephropathy	total RNA	The blood was drawn in the presence of sodium heparin. Total RNA was extracted using the RNeasy Mini Kit (Qiagen, Valencia, CA).	Cy5	Cy5-CTP (exposed samples) and Cy3-CTP (negative control samples) were fluorescently labeled during the step of cDNA was transcribed into complimentary RNA (cRNA). We used Agilent LIRAK PLUS, two color Low Input RNA Linear Amplification Kit method according manufacturer’s instructions	9606	human reference total RNA pool	Homo sapiens	tissue: 10 human cell lines	total RNA	The blood was drawn in the presence of sodium heparin. Total RNA was extracted using the RNeasy Mini Kit (Qiagen, Valencia, CA).	Cy3	Cy5-CTP (exposed samples) and Cy3-CTP (negative control samples) were fluorescently labeled during the step of cDNA was transcribed into complimentary RNA (cRNA). We used Agilent LIRAK PLUS, two color Low Input RNA Linear Amplification Kit method according manufacturer’s instructions	9606	We followed Agilent’s hybridization protocol. Equal amounts of the exposed and negative control sample (825 ng) were competitively hybridized onto Agilent Whole 4×44K Human oligonucleotide arrays in a hybridization oven at 65°C for 17 hours. Slides were washed according to the manufacturer’s instructions with washing buffers and finally dipped in Stabilization and Drying Solution (Agilent Technol…	We followed Agilent’s scan protocol. The arrays were scanned on an Agilent scanner (G2565BA, Agilent Technologies, Palo Alto, CA), and further processed using Agilent Feature Extraction Software	DM_No11	Agilent Feature Extraction Software was used for background subtraction GeneSpring was used for normalization	GPL6480	Swastika,,Sur	swastika.sur@gmail.com	4027091326	Sarwal Lab	Surgery	UCSF	513 Parnassus Ave	San Francisco	CA	94143	USA	ftp://ftp.ncbi.nlm.nih.gov/geo/samples/GSM4221nnn/GSM4221588/suppl/GSM4221588_251485074260_201209201017_S01_GE2_107_Sep09_1_1_DNG3-7_.txt.gz	30811	diabetic nephropathy	peripheral blood	10 human cell lines
GSM4221589	DNG4-1	GSM4221589	Public on Dec 01 2020	Dec 16 2019	Dec 02 2020	RNA	2	blood	Homo sapiens	tissue: peripheral blood	diagnosis: diabetic nephropathy	total RNA	The blood was drawn in the presence of sodium heparin. Total RNA was extracted using the RNeasy Mini Kit (Qiagen, Valencia, CA).	Cy5	Cy5-CTP (exposed samples) and Cy3-CTP (negative control samples) were fluorescently labeled during the step of cDNA was transcribed into complimentary RNA (cRNA). We used Agilent LIRAK PLUS, two color Low Input RNA Linear Amplification Kit method according manufacturer’s instructions	9606	human reference total RNA pool	Homo sapiens	tissue: 10 human cell lines	total RNA	The blood was drawn in the presence of sodium heparin. Total RNA was extracted using the RNeasy Mini Kit (Qiagen, Valencia, CA).	Cy3	Cy5-CTP (exposed samples) and Cy3-CTP (negative control samples) were fluorescently labeled during the step of cDNA was transcribed into complimentary RNA (cRNA). We used Agilent LIRAK PLUS, two color Low Input RNA Linear Amplification Kit method according manufacturer’s instructions	9606	We followed Agilent’s hybridization protocol. Equal amounts of the exposed and negative control sample (825 ng) were competitively hybridized onto Agilent Whole 4×44K Human oligonucleotide arrays in a hybridization oven at 65°C for 17 hours. Slides were washed according to the manufacturer’s instructions with washing buffers and finally dipped in Stabilization and Drying Solution (Agilent Technol…	We followed Agilent’s scan protocol. The arrays were scanned on an Agilent scanner (G2565BA, Agilent Technologies, Palo Alto, CA), and further processed using Agilent Feature Extraction Software	DM_Mi1	Agilent Feature Extraction Software was used for background subtraction GeneSpring was used for normalization	GPL6480	Swastika,,Sur	swastika.sur@gmail.com	4027091326	Sarwal Lab	Surgery	UCSF	513 Parnassus Ave	San Francisco	CA	94143	USA	ftp://ftp.ncbi.nlm.nih.gov/geo/samples/GSM4221nnn/GSM4221589/suppl/GSM4221589_251485073848_201209180930_S01_GE2_107_Sep09_1_4_DNG4-1_.txt.gz	30811	diabetic nephropathy	peripheral blood	10 human cell lines
GSM4221590	DNG4-4	GSM4221590	Public on Dec 01 2020	Dec 16 2019	Dec 02 2020	RNA	2	blood	Homo sapiens	tissue: peripheral blood	diagnosis: diabetic nephropathy	total RNA	The blood was drawn in the presence of sodium heparin. Total RNA was extracted using the RNeasy Mini Kit (Qiagen, Valencia, CA).	Cy5	Cy5-CTP (exposed samples) and Cy3-CTP (negative control samples) were fluorescently labeled during the step of cDNA was transcribed into complimentary RNA (cRNA). We used Agilent LIRAK PLUS, two color Low Input RNA Linear Amplification Kit method according manufacturer’s instructions	9606	human reference total RNA pool	Homo sapiens	tissue: 10 human cell lines	total RNA	The blood was drawn in the presence of sodium heparin. Total RNA was extracted using the RNeasy Mini Kit (Qiagen, Valencia, CA).	Cy3	Cy5-CTP (exposed samples) and Cy3-CTP (negative control samples) were fluorescently labeled during the step of cDNA was transcribed into complimentary RNA (cRNA). We used Agilent LIRAK PLUS, two color Low Input RNA Linear Amplification Kit method according manufacturer’s instructions	9606	We followed Agilent’s hybridization protocol. Equal amounts of the exposed and negative control sample (825 ng) were competitively hybridized onto Agilent Whole 4×44K Human oligonucleotide arrays in a hybridization oven at 65°C for 17 hours. Slides were washed according to the manufacturer’s instructions with washing buffers and finally dipped in Stabilization and Drying Solution (Agilent Technol…	We followed Agilent’s scan protocol. The arrays were scanned on an Agilent scanner (G2565BA, Agilent Technologies, Palo Alto, CA), and further processed using Agilent Feature Extraction Software	DM_Mi2	Agilent Feature Extraction Software was used for background subtraction GeneSpring was used for normalization	GPL6480	Swastika,,Sur	swastika.sur@gmail.com	4027091326	Sarwal Lab	Surgery	UCSF	513 Parnassus Ave	San Francisco	CA	94143	USA	ftp://ftp.ncbi.nlm.nih.gov/geo/samples/GSM4221nnn/GSM4221590/suppl/GSM4221590_251485074257_201209200930_S01_GE2_107_Sep09_1_1_DNG4-4_.txt.gz	30811	diabetic nephropathy	peripheral blood	10 human cell lines
GSM4221591	DNG4-6	GSM4221591	Public on Dec 01 2020	Dec 16 2019	Dec 02 2020	RNA	2	blood	Homo sapiens	tissue: peripheral blood	diagnosis: diabetic nephropathy	total RNA	The blood was drawn in the presence of sodium heparin. Total RNA was extracted using the RNeasy Mini Kit (Qiagen, Valencia, CA).	Cy5	Cy5-CTP (exposed samples) and Cy3-CTP (negative control samples) were fluorescently labeled during the step of cDNA was transcribed into complimentary RNA (cRNA). We used Agilent LIRAK PLUS, two color Low Input RNA Linear Amplification Kit method according manufacturer’s instructions	9606	human reference total RNA pool	Homo sapiens	tissue: 10 human cell lines	total RNA	The blood was drawn in the presence of sodium heparin. Total RNA was extracted using the RNeasy Mini Kit (Qiagen, Valencia, CA).	Cy3	Cy5-CTP (exposed samples) and Cy3-CTP (negative control samples) were fluorescently labeled during the step of cDNA was transcribed into complimentary RNA (cRNA). We used Agilent LIRAK PLUS, two color Low Input RNA Linear Amplification Kit method according manufacturer’s instructions	9606	We followed Agilent’s hybridization protocol. Equal amounts of the exposed and negative control sample (825 ng) were competitively hybridized onto Agilent Whole 4×44K Human oligonucleotide arrays in a hybridization oven at 65°C for 17 hours. Slides were washed according to the manufacturer’s instructions with washing buffers and finally dipped in Stabilization and Drying Solution (Agilent Technol…	We followed Agilent’s scan protocol. The arrays were scanned on an Agilent scanner (G2565BA, Agilent Technologies, Palo Alto, CA), and further processed using Agilent Feature Extraction Software	DM_Mi3	Agilent Feature Extraction Software was used for background subtraction GeneSpring was used for normalization	GPL6480	Swastika,,Sur	swastika.sur@gmail.com	4027091326	Sarwal Lab	Surgery	UCSF	513 Parnassus Ave	San Francisco	CA	94143	USA	ftp://ftp.ncbi.nlm.nih.gov/geo/samples/GSM4221nnn/GSM4221591/suppl/GSM4221591_251485073847_201209180946_S01_GE2_107_Sep09_1_2_DNG4-6_.txt.gz	30811	diabetic nephropathy	peripheral blood	10 human cell lines
GSM4221592	DNG4-10	GSM4221592	Public on Dec 01 2020	Dec 16 2019	Dec 02 2020	RNA	2	blood	Homo sapiens	tissue: peripheral blood	diagnosis: diabetic nephropathy	total RNA	The blood was drawn in the presence of sodium heparin. Total RNA was extracted using the RNeasy Mini Kit (Qiagen, Valencia, CA).	Cy5	Cy5-CTP (exposed samples) and Cy3-CTP (negative control samples) were fluorescently labeled during the step of cDNA was transcribed into complimentary RNA (cRNA). We used Agilent LIRAK PLUS, two color Low Input RNA Linear Amplification Kit method according manufacturer’s instructions	9606	human reference total RNA pool	Homo sapiens	tissue: 10 human cell lines	total RNA	The blood was drawn in the presence of sodium heparin. Total RNA was extracted using the RNeasy Mini Kit (Qiagen, Valencia, CA).	Cy3	Cy5-CTP (exposed samples) and Cy3-CTP (negative control samples) were fluorescently labeled during the step of cDNA was transcribed into complimentary RNA (cRNA). We used Agilent LIRAK PLUS, two color Low Input RNA Linear Amplification Kit method according manufacturer’s instructions	9606	We followed Agilent’s hybridization protocol. Equal amounts of the exposed and negative control sample (825 ng) were competitively hybridized onto Agilent Whole 4×44K Human oligonucleotide arrays in a hybridization oven at 65°C for 17 hours. Slides were washed according to the manufacturer’s instructions with washing buffers and finally dipped in Stabilization and Drying Solution (Agilent Technol…	We followed Agilent’s scan protocol. The arrays were scanned on an Agilent scanner (G2565BA, Agilent Technologies, Palo Alto, CA), and further processed using Agilent Feature Extraction Software	DM_Mi4	Agilent Feature Extraction Software was used for background subtraction GeneSpring was used for normalization	GPL6480	Swastika,,Sur	swastika.sur@gmail.com	4027091326	Sarwal Lab	Surgery	UCSF	513 Parnassus Ave	San Francisco	CA	94143	USA	ftp://ftp.ncbi.nlm.nih.gov/geo/samples/GSM4221nnn/GSM4221592/suppl/GSM4221592_251485073846_201209181018_S01_GE2_107_Sep09_1_2_DNG4-10_.txt.gz	30811	diabetic nephropathy	peripheral blood	10 human cell lines
GSM4221593	DNG4-13	GSM4221593	Public on Dec 01 2020	Dec 16 2019	Dec 02 2020	RNA	2	blood	Homo sapiens	tissue: peripheral blood	diagnosis: diabetic nephropathy	total RNA	The blood was drawn in the presence of sodium heparin. Total RNA was extracted using the RNeasy Mini Kit (Qiagen, Valencia, CA).	Cy5	Cy5-CTP (exposed samples) and Cy3-CTP (negative control samples) were fluorescently labeled during the step of cDNA was transcribed into complimentary RNA (cRNA). We used Agilent LIRAK PLUS, two color Low Input RNA Linear Amplification Kit method according manufacturer’s instructions	9606	human reference total RNA pool	Homo sapiens	tissue: 10 human cell lines	total RNA	The blood was drawn in the presence of sodium heparin. Total RNA was extracted using the RNeasy Mini Kit (Qiagen, Valencia, CA).	Cy3	Cy5-CTP (exposed samples) and Cy3-CTP (negative control samples) were fluorescently labeled during the step of cDNA was transcribed into complimentary RNA (cRNA). We used Agilent LIRAK PLUS, two color Low Input RNA Linear Amplification Kit method according manufacturer’s instructions	9606	We followed Agilent’s hybridization protocol. Equal amounts of the exposed and negative control sample (825 ng) were competitively hybridized onto Agilent Whole 4×44K Human oligonucleotide arrays in a hybridization oven at 65°C for 17 hours. Slides were washed according to the manufacturer’s instructions with washing buffers and finally dipped in Stabilization and Drying Solution (Agilent Technol…	We followed Agilent’s scan protocol. The arrays were scanned on an Agilent scanner (G2565BA, Agilent Technologies, Palo Alto, CA), and further processed using Agilent Feature Extraction Software	DM_Mi5	Agilent Feature Extraction Software was used for background subtraction GeneSpring was used for normalization	GPL6480	Swastika,,Sur	swastika.sur@gmail.com	4027091326	Sarwal Lab	Surgery	UCSF	513 Parnassus Ave	San Francisco	CA	94143	USA	ftp://ftp.ncbi.nlm.nih.gov/geo/samples/GSM4221nnn/GSM4221593/suppl/GSM4221593_251485074261_201209201033_S01_GE2_107_Sep09_1_2_DNG4-13_.txt.gz	30811	diabetic nephropathy	peripheral blood	10 human cell lines
GSM4221594	DNG4-16	GSM4221594	Public on Dec 01 2020	Dec 16 2019	Dec 02 2020	RNA	2	blood	Homo sapiens	tissue: peripheral blood	diagnosis: diabetic nephropathy	total RNA	The blood was drawn in the presence of sodium heparin. Total RNA was extracted using the RNeasy Mini Kit (Qiagen, Valencia, CA).	Cy5	Cy5-CTP (exposed samples) and Cy3-CTP (negative control samples) were fluorescently labeled during the step of cDNA was transcribed into complimentary RNA (cRNA). We used Agilent LIRAK PLUS, two color Low Input RNA Linear Amplification Kit method according manufacturer’s instructions	9606	human reference total RNA pool	Homo sapiens	tissue: 10 human cell lines	total RNA	The blood was drawn in the presence of sodium heparin. Total RNA was extracted using the RNeasy Mini Kit (Qiagen, Valencia, CA).	Cy3	Cy5-CTP (exposed samples) and Cy3-CTP (negative control samples) were fluorescently labeled during the step of cDNA was transcribed into complimentary RNA (cRNA). We used Agilent LIRAK PLUS, two color Low Input RNA Linear Amplification Kit method according manufacturer’s instructions	9606	We followed Agilent’s hybridization protocol. Equal amounts of the exposed and negative control sample (825 ng) were competitively hybridized onto Agilent Whole 4×44K Human oligonucleotide arrays in a hybridization oven at 65°C for 17 hours. Slides were washed according to the manufacturer’s instructions with washing buffers and finally dipped in Stabilization and Drying Solution (Agilent Technol…	We followed Agilent’s scan protocol. The arrays were scanned on an Agilent scanner (G2565BA, Agilent Technologies, Palo Alto, CA), and further processed using Agilent Feature Extraction Software	DM_Mi6	Agilent Feature Extraction Software was used for background subtraction GeneSpring was used for normalization	GPL6480	Swastika,,Sur	swastika.sur@gmail.com	4027091326	Sarwal Lab	Surgery	UCSF	513 Parnassus Ave	San Francisco	CA	94143	USA	ftp://ftp.ncbi.nlm.nih.gov/geo/samples/GSM4221nnn/GSM4221594/suppl/GSM4221594_251485073849_201209181002_S01_GE2_107_Sep09_1_4_DNG4-16_.txt.gz	30811	diabetic nephropathy	peripheral blood	10 human cell lines
GSM4221595	DNG4-26	GSM4221595	Public on Dec 01 2020	Dec 16 2019	Dec 02 2020	RNA	2	blood	Homo sapiens	tissue: peripheral blood	diagnosis: diabetic nephropathy	total RNA	The blood was drawn in the presence of sodium heparin. Total RNA was extracted using the RNeasy Mini Kit (Qiagen, Valencia, CA).	Cy5	Cy5-CTP (exposed samples) and Cy3-CTP (negative control samples) were fluorescently labeled during the step of cDNA was transcribed into complimentary RNA (cRNA). We used Agilent LIRAK PLUS, two color Low Input RNA Linear Amplification Kit method according manufacturer’s instructions	9606	human reference total RNA pool	Homo sapiens	tissue: 10 human cell lines	total RNA	The blood was drawn in the presence of sodium heparin. Total RNA was extracted using the RNeasy Mini Kit (Qiagen, Valencia, CA).	Cy3	Cy5-CTP (exposed samples) and Cy3-CTP (negative control samples) were fluorescently labeled during the step of cDNA was transcribed into complimentary RNA (cRNA). We used Agilent LIRAK PLUS, two color Low Input RNA Linear Amplification Kit method according manufacturer’s instructions	9606	We followed Agilent’s hybridization protocol. Equal amounts of the exposed and negative control sample (825 ng) were competitively hybridized onto Agilent Whole 4×44K Human oligonucleotide arrays in a hybridization oven at 65°C for 17 hours. Slides were washed according to the manufacturer’s instructions with washing buffers and finally dipped in Stabilization and Drying Solution (Agilent Technol…	We followed Agilent’s scan protocol. The arrays were scanned on an Agilent scanner (G2565BA, Agilent Technologies, Palo Alto, CA), and further processed using Agilent Feature Extraction Software	DM_Mi7	Agilent Feature Extraction Software was used for background subtraction GeneSpring was used for normalization	GPL6480	Swastika,,Sur	swastika.sur@gmail.com	4027091326	Sarwal Lab	Surgery	UCSF	513 Parnassus Ave	San Francisco	CA	94143	USA	ftp://ftp.ncbi.nlm.nih.gov/geo/samples/GSM4221nnn/GSM4221595/suppl/GSM4221595_251485074257_201209200930_S01_GE2_107_Sep09_1_2_DNG4-26_.txt.gz	30811	diabetic nephropathy	peripheral blood	10 human cell lines
GSM4221596	DNG5-1	GSM4221596	Public on Dec 01 2020	Dec 16 2019	Dec 02 2020	RNA	2	blood	Homo sapiens	tissue: peripheral blood	diagnosis: diabetic nephropathy	total RNA	The blood was drawn in the presence of sodium heparin. Total RNA was extracted using the RNeasy Mini Kit (Qiagen, Valencia, CA).	Cy5	Cy5-CTP (exposed samples) and Cy3-CTP (negative control samples) were fluorescently labeled during the step of cDNA was transcribed into complimentary RNA (cRNA). We used Agilent LIRAK PLUS, two color Low Input RNA Linear Amplification Kit method according manufacturer’s instructions	9606	human reference total RNA pool	Homo sapiens	tissue: 10 human cell lines	total RNA	The blood was drawn in the presence of sodium heparin. Total RNA was extracted using the RNeasy Mini Kit (Qiagen, Valencia, CA).	Cy3	Cy5-CTP (exposed samples) and Cy3-CTP (negative control samples) were fluorescently labeled during the step of cDNA was transcribed into complimentary RNA (cRNA). We used Agilent LIRAK PLUS, two color Low Input RNA Linear Amplification Kit method according manufacturer’s instructions	9606	We followed Agilent’s hybridization protocol. Equal amounts of the exposed and negative control sample (825 ng) were competitively hybridized onto Agilent Whole 4×44K Human oligonucleotide arrays in a hybridization oven at 65°C for 17 hours. Slides were washed according to the manufacturer’s instructions with washing buffers and finally dipped in Stabilization and Drying Solution (Agilent Technol…	We followed Agilent’s scan protocol. The arrays were scanned on an Agilent scanner (G2565BA, Agilent Technologies, Palo Alto, CA), and further processed using Agilent Feature Extraction Software	DM_Ma1	Agilent Feature Extraction Software was used for background subtraction GeneSpring was used for normalization	GPL6480	Swastika,,Sur	swastika.sur@gmail.com	4027091326	Sarwal Lab	Surgery	UCSF	513 Parnassus Ave	San Francisco	CA	94143	USA	ftp://ftp.ncbi.nlm.nih.gov/geo/samples/GSM4221nnn/GSM4221596/suppl/GSM4221596_251485073847_201209180946_S01_GE2_107_Sep09_1_1_DNG5-1_.txt.gz	30811	diabetic nephropathy	peripheral blood	10 human cell lines
GSM4221597	DNG5-2	GSM4221597	Public on Dec 01 2020	Dec 16 2019	Dec 02 2020	RNA	2	blood	Homo sapiens	tissue: peripheral blood	diagnosis: diabetic nephropathy	total RNA	The blood was drawn in the presence of sodium heparin. Total RNA was extracted using the RNeasy Mini Kit (Qiagen, Valencia, CA).	Cy5	Cy5-CTP (exposed samples) and Cy3-CTP (negative control samples) were fluorescently labeled during the step of cDNA was transcribed into complimentary RNA (cRNA). We used Agilent LIRAK PLUS, two color Low Input RNA Linear Amplification Kit method according manufacturer’s instructions	9606	human reference total RNA pool	Homo sapiens	tissue: 10 human cell lines	total RNA	The blood was drawn in the presence of sodium heparin. Total RNA was extracted using the RNeasy Mini Kit (Qiagen, Valencia, CA).	Cy3	Cy5-CTP (exposed samples) and Cy3-CTP (negative control samples) were fluorescently labeled during the step of cDNA was transcribed into complimentary RNA (cRNA). We used Agilent LIRAK PLUS, two color Low Input RNA Linear Amplification Kit method according manufacturer’s instructions	9606	We followed Agilent’s hybridization protocol. Equal amounts of the exposed and negative control sample (825 ng) were competitively hybridized onto Agilent Whole 4×44K Human oligonucleotide arrays in a hybridization oven at 65°C for 17 hours. Slides were washed according to the manufacturer’s instructions with washing buffers and finally dipped in Stabilization and Drying Solution (Agilent Technol…	We followed Agilent’s scan protocol. The arrays were scanned on an Agilent scanner (G2565BA, Agilent Technologies, Palo Alto, CA), and further processed using Agilent Feature Extraction Software	DM_Ma2	Agilent Feature Extraction Software was used for background subtraction GeneSpring was used for normalization	GPL6480	Swastika,,Sur	swastika.sur@gmail.com	4027091326	Sarwal Lab	Surgery	UCSF	513 Parnassus Ave	San Francisco	CA	94143	USA	ftp://ftp.ncbi.nlm.nih.gov/geo/samples/GSM4221nnn/GSM4221597/suppl/GSM4221597_251485073848_201209180930_S01_GE2_107_Sep09_1_1_DNG5-2_.txt.gz	30811	diabetic nephropathy	peripheral blood	10 human cell lines
GSM4221598	DNG5-3	GSM4221598	Public on Dec 01 2020	Dec 16 2019	Dec 02 2020	RNA	2	blood	Homo sapiens	tissue: peripheral blood	diagnosis: diabetic nephropathy	total RNA	The blood was drawn in the presence of sodium heparin. Total RNA was extracted using the RNeasy Mini Kit (Qiagen, Valencia, CA).	Cy5	Cy5-CTP (exposed samples) and Cy3-CTP (negative control samples) were fluorescently labeled during the step of cDNA was transcribed into complimentary RNA (cRNA). We used Agilent LIRAK PLUS, two color Low Input RNA Linear Amplification Kit method according manufacturer’s instructions	9606	human reference total RNA pool	Homo sapiens	tissue: 10 human cell lines	total RNA	The blood was drawn in the presence of sodium heparin. Total RNA was extracted using the RNeasy Mini Kit (Qiagen, Valencia, CA).	Cy3	Cy5-CTP (exposed samples) and Cy3-CTP (negative control samples) were fluorescently labeled during the step of cDNA was transcribed into complimentary RNA (cRNA). We used Agilent LIRAK PLUS, two color Low Input RNA Linear Amplification Kit method according manufacturer’s instructions	9606	We followed Agilent’s hybridization protocol. Equal amounts of the exposed and negative control sample (825 ng) were competitively hybridized onto Agilent Whole 4×44K Human oligonucleotide arrays in a hybridization oven at 65°C for 17 hours. Slides were washed according to the manufacturer’s instructions with washing buffers and finally dipped in Stabilization and Drying Solution (Agilent Technol…	We followed Agilent’s scan protocol. The arrays were scanned on an Agilent scanner (G2565BA, Agilent Technologies, Palo Alto, CA), and further processed using Agilent Feature Extraction Software	DM_Ma3	Agilent Feature Extraction Software was used for background subtraction GeneSpring was used for normalization	GPL6480	Swastika,,Sur	swastika.sur@gmail.com	4027091326	Sarwal Lab	Surgery	UCSF	513 Parnassus Ave	San Francisco	CA	94143	USA	ftp://ftp.ncbi.nlm.nih.gov/geo/samples/GSM4221nnn/GSM4221598/suppl/GSM4221598_251485073846_201209181018_S01_GE2_107_Sep09_1_1_DNG5-3_.txt.gz	30811	diabetic nephropathy	peripheral blood	10 human cell lines
GSM4221599	DNG5-4	GSM4221599	Public on Dec 01 2020	Dec 16 2019	Dec 02 2020	RNA	2	blood	Homo sapiens	tissue: peripheral blood	diagnosis: diabetic nephropathy	total RNA	The blood was drawn in the presence of sodium heparin. Total RNA was extracted using the RNeasy Mini Kit (Qiagen, Valencia, CA).	Cy5	Cy5-CTP (exposed samples) and Cy3-CTP (negative control samples) were fluorescently labeled during the step of cDNA was transcribed into complimentary RNA (cRNA). We used Agilent LIRAK PLUS, two color Low Input RNA Linear Amplification Kit method according manufacturer’s instructions	9606	human reference total RNA pool	Homo sapiens	tissue: 10 human cell lines	total RNA	The blood was drawn in the presence of sodium heparin. Total RNA was extracted using the RNeasy Mini Kit (Qiagen, Valencia, CA).	Cy3	Cy5-CTP (exposed samples) and Cy3-CTP (negative control samples) were fluorescently labeled during the step of cDNA was transcribed into complimentary RNA (cRNA). We used Agilent LIRAK PLUS, two color Low Input RNA Linear Amplification Kit method according manufacturer’s instructions	9606	We followed Agilent’s hybridization protocol. Equal amounts of the exposed and negative control sample (825 ng) were competitively hybridized onto Agilent Whole 4×44K Human oligonucleotide arrays in a hybridization oven at 65°C for 17 hours. Slides were washed according to the manufacturer’s instructions with washing buffers and finally dipped in Stabilization and Drying Solution (Agilent Technol…	We followed Agilent’s scan protocol. The arrays were scanned on an Agilent scanner (G2565BA, Agilent Technologies, Palo Alto, CA), and further processed using Agilent Feature Extraction Software	DM_Ma4	Agilent Feature Extraction Software was used for background subtraction GeneSpring was used for normalization	GPL6480	Swastika,,Sur	swastika.sur@gmail.com	4027091326	Sarwal Lab	Surgery	UCSF	513 Parnassus Ave	San Francisco	CA	94143	USA	ftp://ftp.ncbi.nlm.nih.gov/geo/samples/GSM4221nnn/GSM4221599/suppl/GSM4221599_251485074258_201209200946_S01_GE2_107_Sep09_1_2_DNG5-4_.txt.gz	30811	diabetic nephropathy	peripheral blood	10 human cell lines
GSM4221600	DNG5-5	GSM4221600	Public on Dec 01 2020	Dec 16 2019	Dec 02 2020	RNA	2	blood	Homo sapiens	tissue: peripheral blood	diagnosis: diabetic nephropathy	total RNA	The blood was drawn in the presence of sodium heparin. Total RNA was extracted using the RNeasy Mini Kit (Qiagen, Valencia, CA).	Cy5	Cy5-CTP (exposed samples) and Cy3-CTP (negative control samples) were fluorescently labeled during the step of cDNA was transcribed into complimentary RNA (cRNA). We used Agilent LIRAK PLUS, two color Low Input RNA Linear Amplification Kit method according manufacturer’s instructions	9606	human reference total RNA pool	Homo sapiens	tissue: 10 human cell lines	total RNA	The blood was drawn in the presence of sodium heparin. Total RNA was extracted using the RNeasy Mini Kit (Qiagen, Valencia, CA).	Cy3	Cy5-CTP (exposed samples) and Cy3-CTP (negative control samples) were fluorescently labeled during the step of cDNA was transcribed into complimentary RNA (cRNA). We used Agilent LIRAK PLUS, two color Low Input RNA Linear Amplification Kit method according manufacturer’s instructions	9606	We followed Agilent’s hybridization protocol. Equal amounts of the exposed and negative control sample (825 ng) were competitively hybridized onto Agilent Whole 4×44K Human oligonucleotide arrays in a hybridization oven at 65°C for 17 hours. Slides were washed according to the manufacturer’s instructions with washing buffers and finally dipped in Stabilization and Drying Solution (Agilent Technol…	We followed Agilent’s scan protocol. The arrays were scanned on an Agilent scanner (G2565BA, Agilent Technologies, Palo Alto, CA), and further processed using Agilent Feature Extraction Software	DM_Ma5	Agilent Feature Extraction Software was used for background subtraction GeneSpring was used for normalization	GPL6480	Swastika,,Sur	swastika.sur@gmail.com	4027091326	Sarwal Lab	Surgery	UCSF	513 Parnassus Ave	San Francisco	CA	94143	USA	ftp://ftp.ncbi.nlm.nih.gov/geo/samples/GSM4221nnn/GSM4221600/suppl/GSM4221600_251485073847_201209180946_S01_GE2_107_Sep09_1_4_DNG5-5_.txt.gz	30811	diabetic nephropathy	peripheral blood	10 human cell lines
GSM4221601	DN2	GSM4221601	Public on Dec 01 2020	Dec 16 2019	Dec 02 2020	RNA	2	blood	Homo sapiens	tissue: peripheral blood	diagnosis: ESRD	total RNA	The blood was drawn in the presence of sodium heparin. Total RNA was extracted using the RNeasy Mini Kit (Qiagen, Valencia, CA).	Cy5	Cy5-CTP (exposed samples) and Cy3-CTP (negative control samples) were fluorescently labeled during the step of cDNA was transcribed into complimentary RNA (cRNA). We used Agilent LIRAK PLUS, two color Low Input RNA Linear Amplification Kit method according manufacturer’s instructions	9606	human reference total RNA pool	Homo sapiens	tissue: 10 human cell lines	total RNA	The blood was drawn in the presence of sodium heparin. Total RNA was extracted using the RNeasy Mini Kit (Qiagen, Valencia, CA).	Cy3	Cy5-CTP (exposed samples) and Cy3-CTP (negative control samples) were fluorescently labeled during the step of cDNA was transcribed into complimentary RNA (cRNA). We used Agilent LIRAK PLUS, two color Low Input RNA Linear Amplification Kit method according manufacturer’s instructions	9606	We followed Agilent’s hybridization protocol. Equal amounts of the exposed and negative control sample (825 ng) were competitively hybridized onto Agilent Whole 4×44K Human oligonucleotide arrays in a hybridization oven at 65°C for 17 hours. Slides were washed according to the manufacturer’s instructions with washing buffers and finally dipped in Stabilization and Drying Solution (Agilent Technol…	We followed Agilent’s scan protocol. The arrays were scanned on an Agilent scanner (G2565BA, Agilent Technologies, Palo Alto, CA), and further processed using Agilent Feature Extraction Software	DM_ESRD1	Agilent Feature Extraction Software was used for background subtraction GeneSpring was used for normalization	GPL6480	Swastika,,Sur	swastika.sur@gmail.com	4027091326	Sarwal Lab	Surgery	UCSF	513 Parnassus Ave	San Francisco	CA	94143	USA	ftp://ftp.ncbi.nlm.nih.gov/geo/samples/GSM4221nnn/GSM4221601/suppl/GSM4221601_251485074261_201209201033_S01_GE2_107_Sep09_1_4_DN2_.txt.gz	30811	ESRD	peripheral blood	10 human cell lines
GSM4221602	DN8	GSM4221602	Public on Dec 01 2020	Dec 16 2019	Dec 02 2020	RNA	2	blood	Homo sapiens	tissue: peripheral blood	diagnosis: ESRD	total RNA	The blood was drawn in the presence of sodium heparin. Total RNA was extracted using the RNeasy Mini Kit (Qiagen, Valencia, CA).	Cy5	Cy5-CTP (exposed samples) and Cy3-CTP (negative control samples) were fluorescently labeled during the step of cDNA was transcribed into complimentary RNA (cRNA). We used Agilent LIRAK PLUS, two color Low Input RNA Linear Amplification Kit method according manufacturer’s instructions	9606	human reference total RNA pool	Homo sapiens	tissue: 10 human cell lines	total RNA	The blood was drawn in the presence of sodium heparin. Total RNA was extracted using the RNeasy Mini Kit (Qiagen, Valencia, CA).	Cy3	Cy5-CTP (exposed samples) and Cy3-CTP (negative control samples) were fluorescently labeled during the step of cDNA was transcribed into complimentary RNA (cRNA). We used Agilent LIRAK PLUS, two color Low Input RNA Linear Amplification Kit method according manufacturer’s instructions	9606	We followed Agilent’s hybridization protocol. Equal amounts of the exposed and negative control sample (825 ng) were competitively hybridized onto Agilent Whole 4×44K Human oligonucleotide arrays in a hybridization oven at 65°C for 17 hours. Slides were washed according to the manufacturer’s instructions with washing buffers and finally dipped in Stabilization and Drying Solution (Agilent Technol…	We followed Agilent’s scan protocol. The arrays were scanned on an Agilent scanner (G2565BA, Agilent Technologies, Palo Alto, CA), and further processed using Agilent Feature Extraction Software	DM_ESRD2	Agilent Feature Extraction Software was used for background subtraction GeneSpring was used for normalization	GPL6480	Swastika,,Sur	swastika.sur@gmail.com	4027091326	Sarwal Lab	Surgery	UCSF	513 Parnassus Ave	San Francisco	CA	94143	USA	ftp://ftp.ncbi.nlm.nih.gov/geo/samples/GSM4221nnn/GSM4221602/suppl/GSM4221602_251485074260_201209201017_S01_GE2_107_Sep09_1_2_DN8_.txt.gz	30811	ESRD	peripheral blood	10 human cell lines
GSM4221603	DN13	GSM4221603	Public on Dec 01 2020	Dec 16 2019	Dec 02 2020	RNA	2	blood	Homo sapiens	tissue: peripheral blood	diagnosis: ESRD	total RNA	The blood was drawn in the presence of sodium heparin. Total RNA was extracted using the RNeasy Mini Kit (Qiagen, Valencia, CA).	Cy5	Cy5-CTP (exposed samples) and Cy3-CTP (negative control samples) were fluorescently labeled during the step of cDNA was transcribed into complimentary RNA (cRNA). We used Agilent LIRAK PLUS, two color Low Input RNA Linear Amplification Kit method according manufacturer’s instructions	9606	human reference total RNA pool	Homo sapiens	tissue: 10 human cell lines	total RNA	The blood was drawn in the presence of sodium heparin. Total RNA was extracted using the RNeasy Mini Kit (Qiagen, Valencia, CA).	Cy3	Cy5-CTP (exposed samples) and Cy3-CTP (negative control samples) were fluorescently labeled during the step of cDNA was transcribed into complimentary RNA (cRNA). We used Agilent LIRAK PLUS, two color Low Input RNA Linear Amplification Kit method according manufacturer’s instructions	9606	We followed Agilent’s hybridization protocol. Equal amounts of the exposed and negative control sample (825 ng) were competitively hybridized onto Agilent Whole 4×44K Human oligonucleotide arrays in a hybridization oven at 65°C for 17 hours. Slides were washed according to the manufacturer’s instructions with washing buffers and finally dipped in Stabilization and Drying Solution (Agilent Technol…	We followed Agilent’s scan protocol. The arrays were scanned on an Agilent scanner (G2565BA, Agilent Technologies, Palo Alto, CA), and further processed using Agilent Feature Extraction Software	DM_ESRD3	Agilent Feature Extraction Software was used for background subtraction GeneSpring was used for normalization	GPL6480	Swastika,,Sur	swastika.sur@gmail.com	4027091326	Sarwal Lab	Surgery	UCSF	513 Parnassus Ave	San Francisco	CA	94143	USA	ftp://ftp.ncbi.nlm.nih.gov/geo/samples/GSM4221nnn/GSM4221603/suppl/GSM4221603_251485074259_201209201002_S01_GE2_107_Sep09_1_3_DN13_.txt.gz	30811	ESRD	peripheral blood	10 human cell lines
GSM4221604	DN14	GSM4221604	Public on Dec 01 2020	Dec 16 2019	Dec 02 2020	RNA	2	blood	Homo sapiens	tissue: peripheral blood	diagnosis: ESRD	total RNA	The blood was drawn in the presence of sodium heparin. Total RNA was extracted using the RNeasy Mini Kit (Qiagen, Valencia, CA).	Cy5	Cy5-CTP (exposed samples) and Cy3-CTP (negative control samples) were fluorescently labeled during the step of cDNA was transcribed into complimentary RNA (cRNA). We used Agilent LIRAK PLUS, two color Low Input RNA Linear Amplification Kit method according manufacturer’s instructions	9606	human reference total RNA pool	Homo sapiens	tissue: 10 human cell lines	total RNA	The blood was drawn in the presence of sodium heparin. Total RNA was extracted using the RNeasy Mini Kit (Qiagen, Valencia, CA).	Cy3	Cy5-CTP (exposed samples) and Cy3-CTP (negative control samples) were fluorescently labeled during the step of cDNA was transcribed into complimentary RNA (cRNA). We used Agilent LIRAK PLUS, two color Low Input RNA Linear Amplification Kit method according manufacturer’s instructions	9606	We followed Agilent’s hybridization protocol. Equal amounts of the exposed and negative control sample (825 ng) were competitively hybridized onto Agilent Whole 4×44K Human oligonucleotide arrays in a hybridization oven at 65°C for 17 hours. Slides were washed according to the manufacturer’s instructions with washing buffers and finally dipped in Stabilization and Drying Solution (Agilent Technol…	We followed Agilent’s scan protocol. The arrays were scanned on an Agilent scanner (G2565BA, Agilent Technologies, Palo Alto, CA), and further processed using Agilent Feature Extraction Software	DM_ESRD4	Agilent Feature Extraction Software was used for background subtraction GeneSpring was used for normalization	GPL6480	Swastika,,Sur	swastika.sur@gmail.com	4027091326	Sarwal Lab	Surgery	UCSF	513 Parnassus Ave	San Francisco	CA	94143	USA	ftp://ftp.ncbi.nlm.nih.gov/geo/samples/GSM4221nnn/GSM4221604/suppl/GSM4221604_251485073848_201209180930_S01_GE2_107_Sep09_1_3_DN14_.txt.gz	30811	ESRD	peripheral blood	10 human cell lines
GSM4221605	DN15	GSM4221605	Public on Dec 01 2020	Dec 16 2019	Dec 02 2020	RNA	2	blood	Homo sapiens	tissue: peripheral blood	diagnosis: ESRD	total RNA	The blood was drawn in the presence of sodium heparin. Total RNA was extracted using the RNeasy Mini Kit (Qiagen, Valencia, CA).	Cy5	Cy5-CTP (exposed samples) and Cy3-CTP (negative control samples) were fluorescently labeled during the step of cDNA was transcribed into complimentary RNA (cRNA). We used Agilent LIRAK PLUS, two color Low Input RNA Linear Amplification Kit method according manufacturer’s instructions	9606	human reference total RNA pool	Homo sapiens	tissue: 10 human cell lines	total RNA	The blood was drawn in the presence of sodium heparin. Total RNA was extracted using the RNeasy Mini Kit (Qiagen, Valencia, CA).	Cy3	Cy5-CTP (exposed samples) and Cy3-CTP (negative control samples) were fluorescently labeled during the step of cDNA was transcribed into complimentary RNA (cRNA). We used Agilent LIRAK PLUS, two color Low Input RNA Linear Amplification Kit method according manufacturer’s instructions	9606	We followed Agilent’s hybridization protocol. Equal amounts of the exposed and negative control sample (825 ng) were competitively hybridized onto Agilent Whole 4×44K Human oligonucleotide arrays in a hybridization oven at 65°C for 17 hours. Slides were washed according to the manufacturer’s instructions with washing buffers and finally dipped in Stabilization and Drying Solution (Agilent Technol…	We followed Agilent’s scan protocol. The arrays were scanned on an Agilent scanner (G2565BA, Agilent Technologies, Palo Alto, CA), and further processed using Agilent Feature Extraction Software	DM_ESRD5	Agilent Feature Extraction Software was used for background subtraction GeneSpring was used for normalization	GPL6480	Swastika,,Sur	swastika.sur@gmail.com	4027091326	Sarwal Lab	Surgery	UCSF	513 Parnassus Ave	San Francisco	CA	94143	USA	ftp://ftp.ncbi.nlm.nih.gov/geo/samples/GSM4221nnn/GSM4221605/suppl/GSM4221605_251485074257_201209200930_S01_GE2_107_Sep09_1_4_DN15_.txt.gz	30811	ESRD	peripheral blood	10 human cell lines
GSM4221606	DN17	GSM4221606	Public on Dec 01 2020	Dec 16 2019	Dec 02 2020	RNA	2	blood	Homo sapiens	tissue: peripheral blood	diagnosis: ESRD	total RNA	The blood was drawn in the presence of sodium heparin. Total RNA was extracted using the RNeasy Mini Kit (Qiagen, Valencia, CA).	Cy5	Cy5-CTP (exposed samples) and Cy3-CTP (negative control samples) were fluorescently labeled during the step of cDNA was transcribed into complimentary RNA (cRNA). We used Agilent LIRAK PLUS, two color Low Input RNA Linear Amplification Kit method according manufacturer’s instructions	9606	human reference total RNA pool	Homo sapiens	tissue: 10 human cell lines	total RNA	The blood was drawn in the presence of sodium heparin. Total RNA was extracted using the RNeasy Mini Kit (Qiagen, Valencia, CA).	Cy3	Cy5-CTP (exposed samples) and Cy3-CTP (negative control samples) were fluorescently labeled during the step of cDNA was transcribed into complimentary RNA (cRNA). We used Agilent LIRAK PLUS, two color Low Input RNA Linear Amplification Kit method according manufacturer’s instructions	9606	We followed Agilent’s hybridization protocol. Equal amounts of the exposed and negative control sample (825 ng) were competitively hybridized onto Agilent Whole 4×44K Human oligonucleotide arrays in a hybridization oven at 65°C for 17 hours. Slides were washed according to the manufacturer’s instructions with washing buffers and finally dipped in Stabilization and Drying Solution (Agilent Technol…	We followed Agilent’s scan protocol. The arrays were scanned on an Agilent scanner (G2565BA, Agilent Technologies, Palo Alto, CA), and further processed using Agilent Feature Extraction Software	DM_ESRD6	Agilent Feature Extraction Software was used for background subtraction GeneSpring was used for normalization	GPL6480	Swastika,,Sur	swastika.sur@gmail.com	4027091326	Sarwal Lab	Surgery	UCSF	513 Parnassus Ave	San Francisco	CA	94143	USA	ftp://ftp.ncbi.nlm.nih.gov/geo/samples/GSM4221nnn/GSM4221606/suppl/GSM4221606_251485074259_201209201002_S01_GE2_107_Sep09_1_1_DN17_.txt.gz	30811	ESRD	peripheral blood	10 human cell lines
GSM4221607	DN18	GSM4221607	Public on Dec 01 2020	Dec 16 2019	Dec 02 2020	RNA	2	blood	Homo sapiens	tissue: peripheral blood	diagnosis: ESRD	total RNA	The blood was drawn in the presence of sodium heparin. Total RNA was extracted using the RNeasy Mini Kit (Qiagen, Valencia, CA).	Cy5	Cy5-CTP (exposed samples) and Cy3-CTP (negative control samples) were fluorescently labeled during the step of cDNA was transcribed into complimentary RNA (cRNA). We used Agilent LIRAK PLUS, two color Low Input RNA Linear Amplification Kit method according manufacturer’s instructions	9606	human reference total RNA pool	Homo sapiens	tissue: 10 human cell lines	total RNA	The blood was drawn in the presence of sodium heparin. Total RNA was extracted using the RNeasy Mini Kit (Qiagen, Valencia, CA).	Cy3	Cy5-CTP (exposed samples) and Cy3-CTP (negative control samples) were fluorescently labeled during the step of cDNA was transcribed into complimentary RNA (cRNA). We used Agilent LIRAK PLUS, two color Low Input RNA Linear Amplification Kit method according manufacturer’s instructions	9606	We followed Agilent’s hybridization protocol. Equal amounts of the exposed and negative control sample (825 ng) were competitively hybridized onto Agilent Whole 4×44K Human oligonucleotide arrays in a hybridization oven at 65°C for 17 hours. Slides were washed according to the manufacturer’s instructions with washing buffers and finally dipped in Stabilization and Drying Solution (Agilent Technol…	We followed Agilent’s scan protocol. The arrays were scanned on an Agilent scanner (G2565BA, Agilent Technologies, Palo Alto, CA), and further processed using Agilent Feature Extraction Software	DM_ESRD7	Agilent Feature Extraction Software was used for background subtraction GeneSpring was used for normalization	GPL6480	Swastika,,Sur	swastika.sur@gmail.com	4027091326	Sarwal Lab	Surgery	UCSF	513 Parnassus Ave	San Francisco	CA	94143	USA	ftp://ftp.ncbi.nlm.nih.gov/geo/samples/GSM4221nnn/GSM4221607/suppl/GSM4221607_251485074258_201209200946_S01_GE2_107_Sep09_1_1_DN18_.txt.gz	30811	ESRD	peripheral blood	10 human cell lines

## Sheet: Sheet2
Table SII. Model feature gene ranking table.
Feature name	Feature ID	AvgRank
CYP51A1	17	2.1
CHKA	16	2.8
SAMD8	10	4.3
G0S2	7	4.8
ACSL1	12	4.8
TNFAIP8L2	8	7.8
PLD1	11	9.1
LBR	3	9.2
ACADM	5	9.2
IDI1	13	10.6
ACOT13	6	10.9
ETNK1	4	11
GABARAPL1	9	12
PTS	15	12.1
PI4K2A	1	13.6
INSIG1	14	13.6
ST8SIA1	2	15.1
AvgRank：the RANK.AVG function, is used to return the average rank of a specified value within a dataset.
